# Supplementary material for: A Gene Module-Based eQTL Analysis Prioritizing Disease Genes and Pathways in Kidney Cancer
Source: PubMed Central journal article supplement (PMC5683705; doi:10.1016/j.csbj.2017.09.003), 2017-10-10
Supplement: mmc1.pdf [file mmc1.pdf]

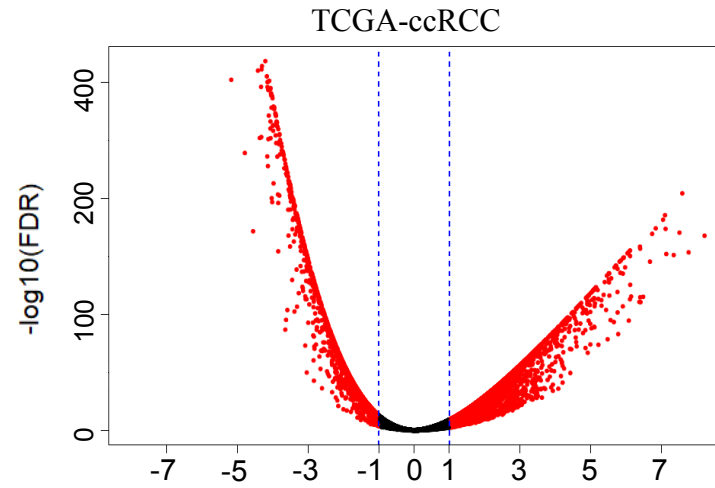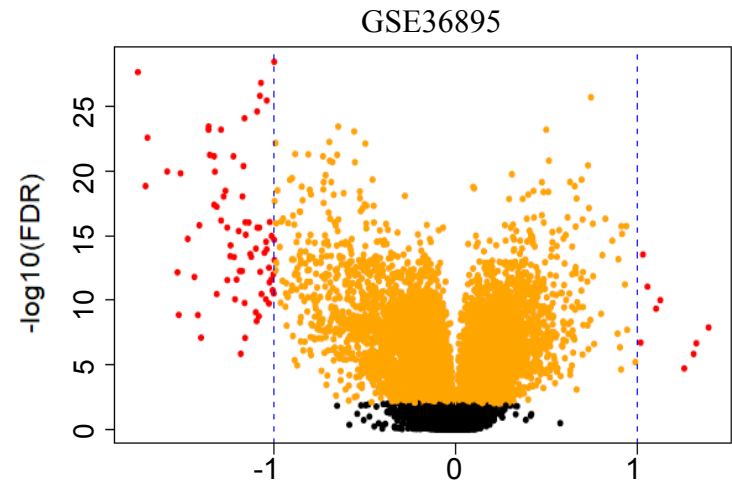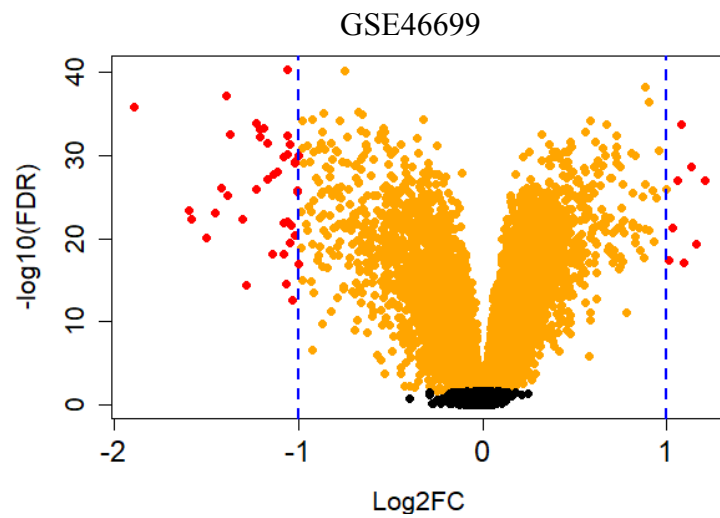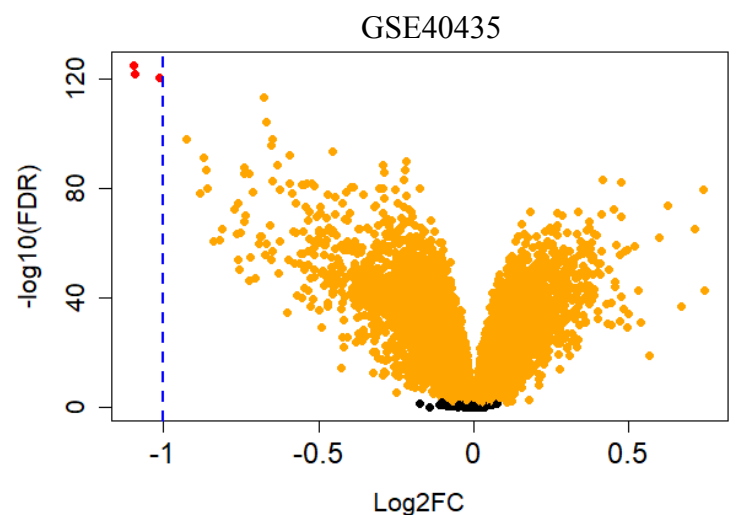

Supp. Figure 1. The volcano plots of the expression of four ccRCC data sets.

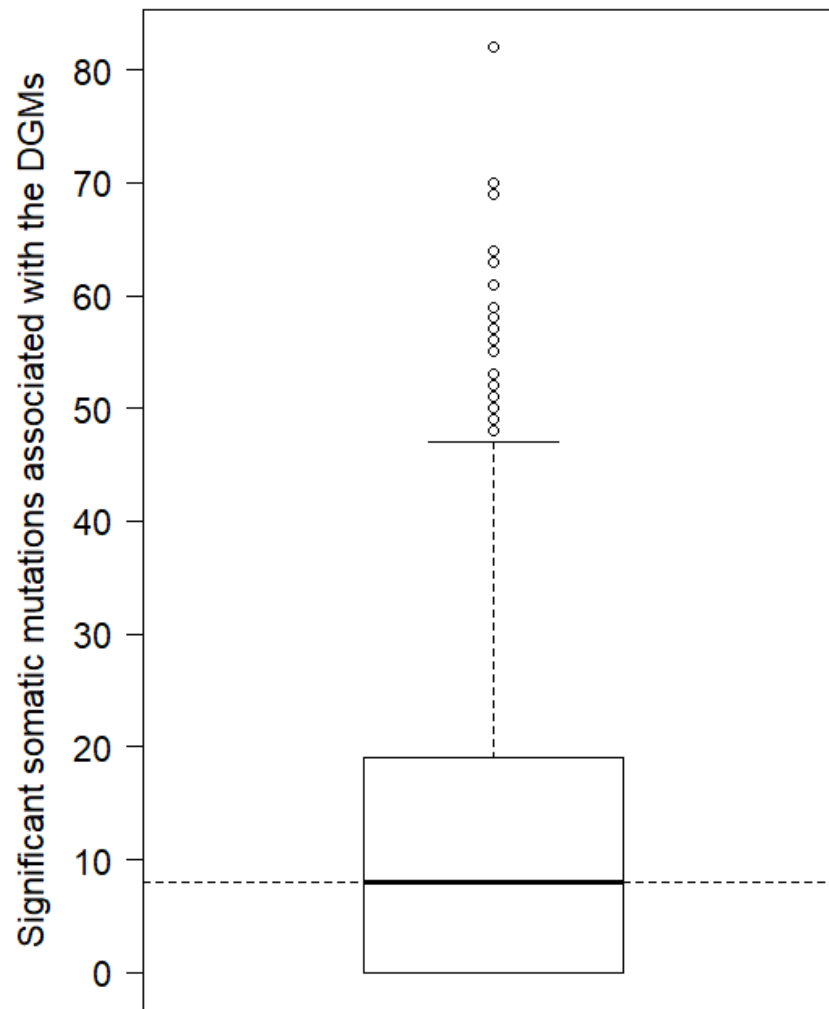

Supp. Figure 2 The box plot of the somatic mutations that were associated with the DGMs

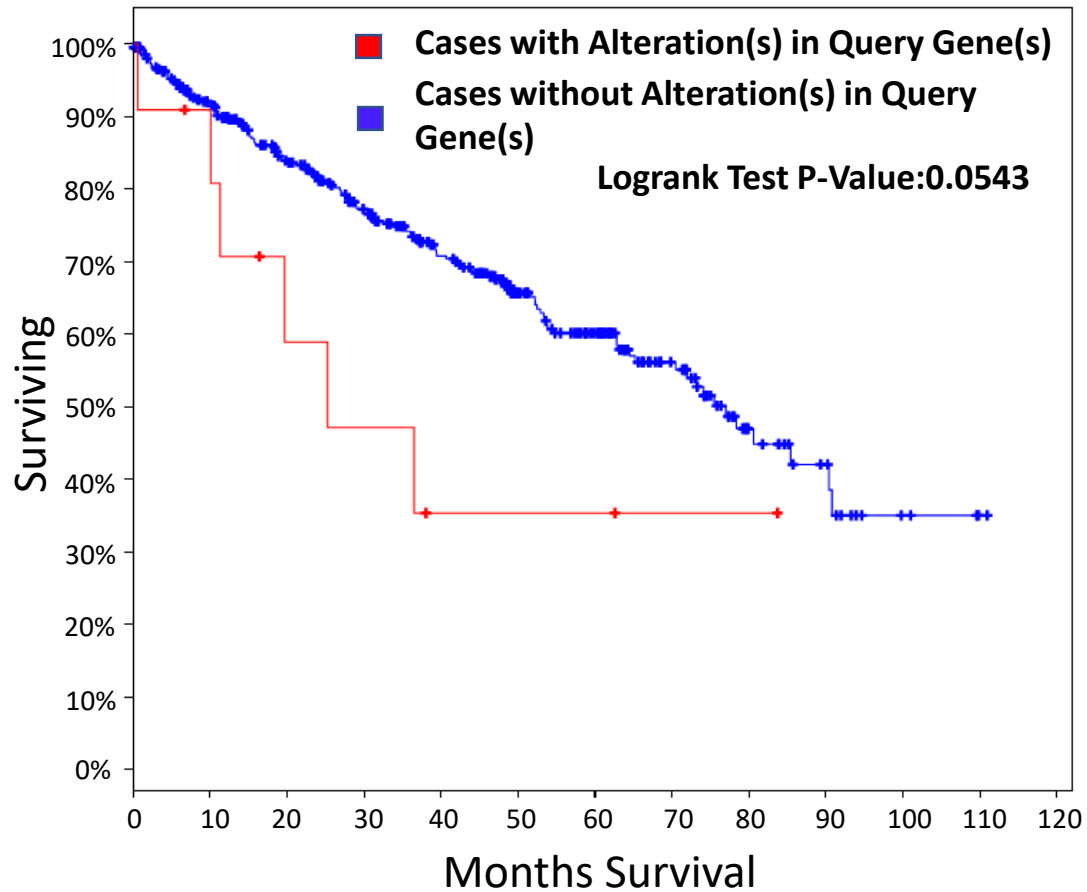

|                                              | #total cases | #cases deceased | Median months survival |
|----------------------------------------------|--------------|-----------------|------------------------|
| Cases with Alteration(s) in Query Gene(s)    | 11           | 6               | 25.27                  |
| Cases without Alteration(s) in Query Gene(s) | 410          | 136             | 76.98                  |

Supp. Figure 3 The survival analysis of patients with genetic mutations of NOD2, RRM1, CSRN1, SLC4A2, TLL1 and CNTN1
